# Supplementary material for: Radiosensitizing effect of curcumin-loaded lipid nanoparticles in breast cancer cells
Source: PubMed Central journal article supplement (PMC6668411; doi:10.1038/s41598-019-47553-2), 2019-07-31

## **Radiosensitizing effect of curcumin-loaded lipid nanoparticles in breast cancer cells**

Luigi Minafra<sup>1\*</sup>, Nunziatina Porcino<sup>1\*</sup>, Valentina Bravatà<sup>1§</sup>, Daniela Gaglio<sup>1,2</sup>, Marcella Bonanomi<sup>2</sup>, Erika Amore<sup>3</sup>, Francesco Paolo Cammarata<sup>1</sup>, Giorgio Russo<sup>1</sup>, Carmelo Militello<sup>1</sup>, Gaetano Savoca<sup>1</sup>, Margherita Baglio<sup>1</sup>, Boris Abbate<sup>4</sup>, Giuseppina Iacoviello<sup>4</sup>, Giovanna Evangelista<sup>5</sup>, Maria Carla Gilardi<sup>1,6</sup>, Maria Luisa Bondi<sup>3</sup>, Giusi Irma Forte<sup>1</sup>

<sup>1</sup>Istituto di Bioimmagini e Fisiologia Molecolare-Consiglio Nazionale delle Ricerche (IBFM-CNR), Cefalù (PA), Italy

<sup>2</sup>SYSBIO Centre of Systems Biology, University of Milano-Bicocca, Milano, Italy.

<sup>3</sup>Istituto per lo Studio dei Materiali Nanostrutturati-Consiglio Nazionale delle Ricerche (ISMN-CNR), Palermo, Italy

<sup>4</sup>Medical Physics Department, ARNAS-Civico Hospital, Palermo, Italy.

<sup>5</sup>Radiation Oncology, ARNAS-Civico Hospital, Palermo, Italy.

<sup>6</sup>Department of Medicine and Surgery, University of Milano-Bicocca, Monza, Italy

\*These authors contributed equally to this work

§Corresponding author: PhD Valentina Bravatà: [valentina.bravata@ibfm.cnr.it](mailto:valentina.bravata@ibfm.cnr.it)

### **email addresses:**

Luigi Minafra: [luigi.minafra@ibfm.cnr.it](mailto:luigi.minafra@ibfm.cnr.it)

Nunziatina Porcino: [nunziatina.porcino@ibfm.cnr.it](mailto:nunziatina.porcino@ibfm.cnr.it)

Daniela Gaglio: [daniela.gaglio@ibfm.cnr.it](mailto:daniela.gaglio@ibfm.cnr.it)

Marcella Bonanomi: [marcella.bonanomi@unimib.it](mailto:marcella.bonanomi@unimib.it)

Erika Amore: [erika.amore@pa.ismn.cnr.it](mailto:erika.amore@pa.ismn.cnr.it)

Francesco Paolo Cammarata: [francesco.cammarata@ibfm.cnr.it](mailto:francesco.cammarata@ibfm.cnr.it)

Giorgio Russo: [giorgio.russo@ibfm.cnr.it](mailto:giorgio.russo@ibfm.cnr.it)

Carmelo Militello: [carmelo.militello@ibfm.cnr.it](mailto:carmelo.militello@ibfm.cnr.it)

Gaetano Savoca: [savoca.gaetano@gmail.com](mailto:savoca.gaetano@gmail.com)

Margherita Baglio: [margo4@hotmail.it](mailto:margo4@hotmail.it)

Boris Abbate: [borisfederico.abbate@arnascivico.it](mailto:borisfederico.abbate@arnascivico.it)

Giuseppina Iacoviello: [giuseppina.iacoviello@arnascivico.it](mailto:giuseppina.iacoviello@arnascivico.it)

Giovanna Evangelista: [giovanna.evangelista@arnascivico.it](mailto:giovanna.evangelista@arnascivico.it)

Maria Carla Gilardi: [mariacarla.gilardi@ibfm.cnr.it](mailto:mariacarla.gilardi@ibfm.cnr.it)

Maria Luisa Bondi: [ricercatore.bondi@gmail.com](mailto:ricercatore.bondi@gmail.com)

Giusi Irma Forte: [giusi.forte@ibfm.cnr.it](mailto:giusi.forte@ibfm.cnr.it)

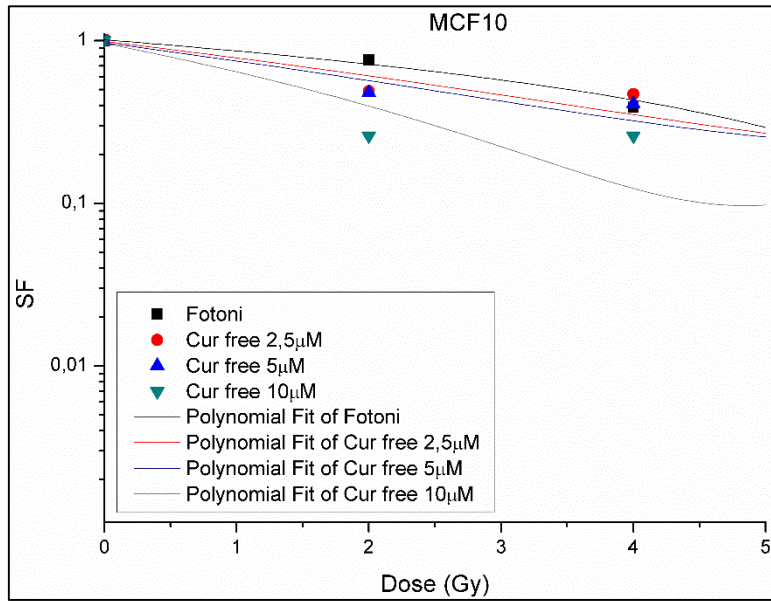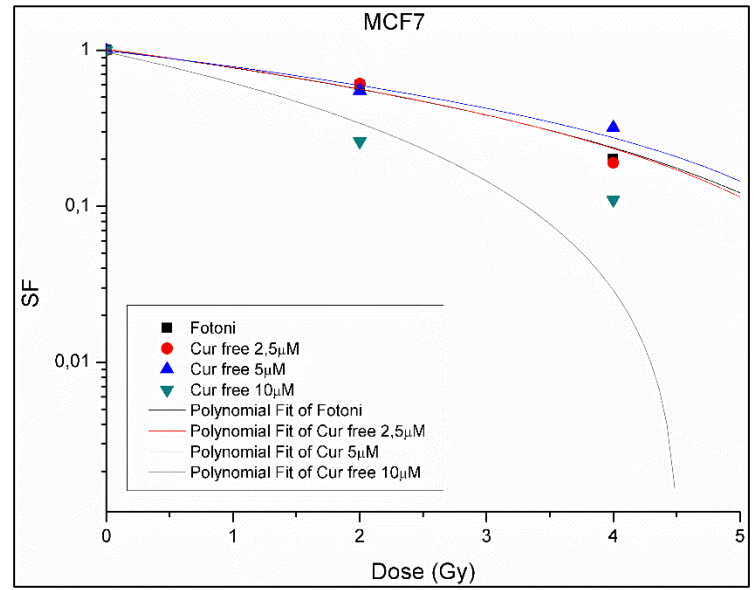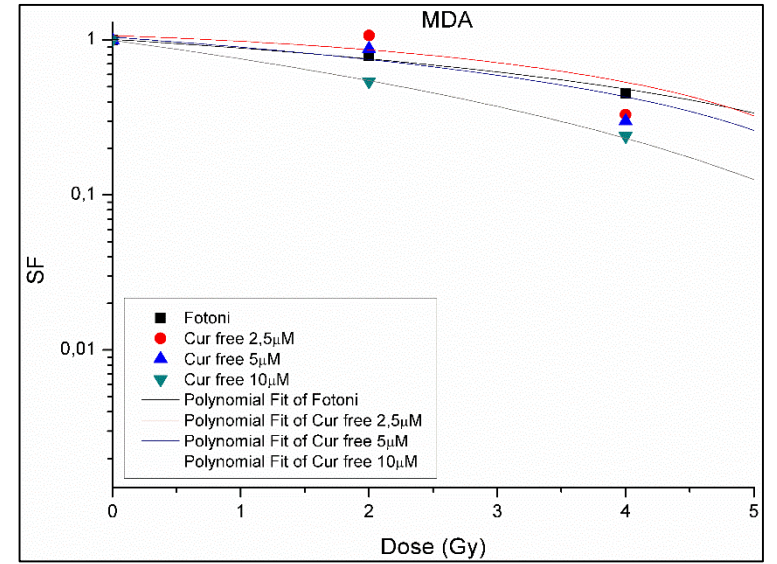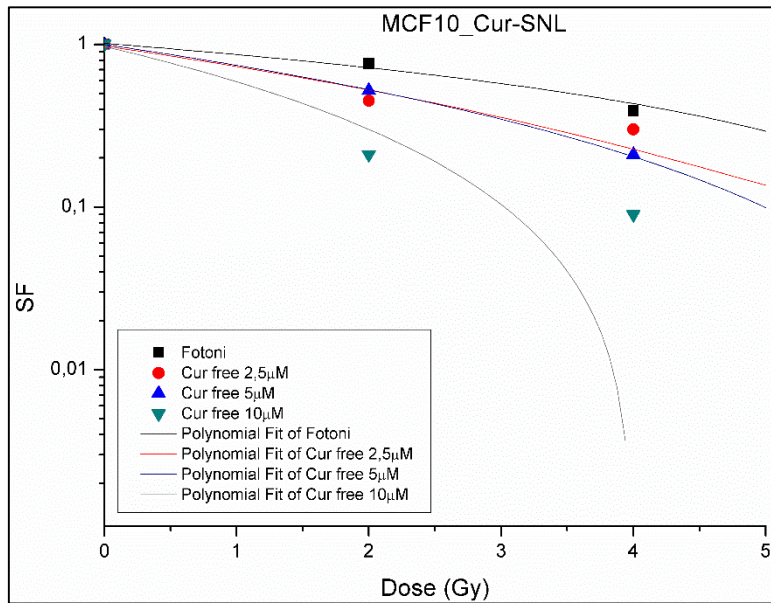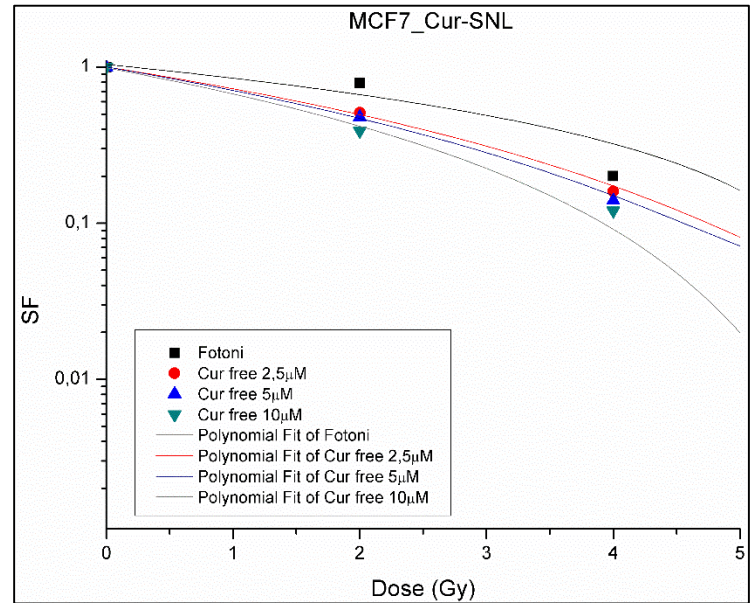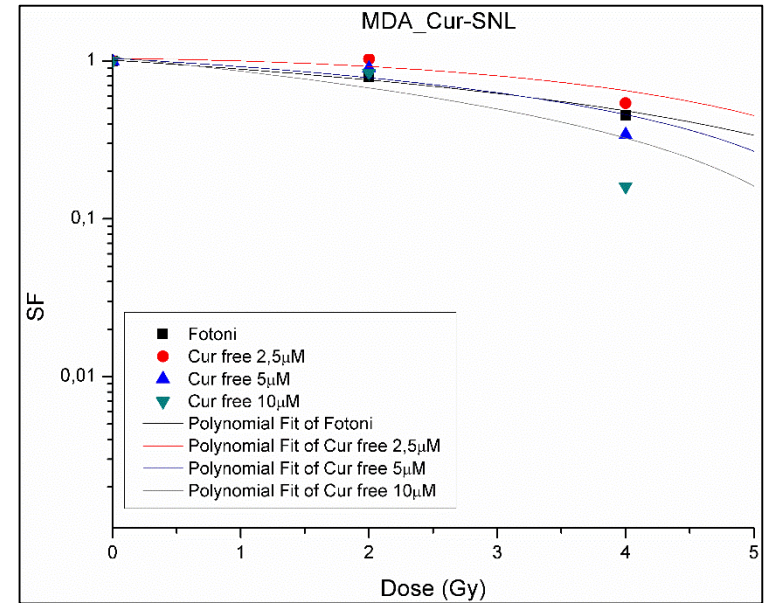

Supplement: 41598_2019_47553_MOESM1_ESM.pdf [file 41598_2019_47553_MOESM1_ESM.pdf]
